# Supplementary material
Source: PubMed Central journal article supplement (PMC3710768)
Supplement: mmc1.pdf [file mmc1.pdf]

## **Supplemental Data**

### **Mutations in GDP-Mannose Pyrophosphorylase B**

### **Cause Congenital and Limb-Girdle Muscular Dystrophies**

### **Associated with Hypoglycosylation of $\alpha$ -Dystroglycan**

Keren J. Carss, Elizabeth Stevens, A. Reghan Foley, Sebahattin Cirak, Moniek Riemersma, Silvia Torelli, Alexander Hoischen, Tobias Willer, Monique van Scherpenzeel, Steven A. Moore, Sonia Messina, Enrico Bertini, Carsten G. Bönnemann, Jose E. Abdenur, Carla M. Grosman, Akanchha Kesari, Jaya Punetha, Ros Quinlivan, Leigh B. Waddell, Helen K. Young, Elizabeth Wraige, Shu Yau, Lina Brodd, Lucy Feng, Caroline Sewry, Daniel G. MacArthur, Kathryn N. North, Eric Hoffman, Derek L. Stemple, Matthew E. Hurles, Hans van Bokhoven, Kevin P. Campbell, Dirk J. Lefebvre, UK10K consortium, Yung-Yao Lin, and Francesco Muntoni

## **Supplemental Acknowledgments**

The National Specialised Commissioned Team (NSCT) funding for the Congenital Muscular Dystrophies and Congenital Myopathies service in London is gratefully acknowledged. ARF is a Muscular Dystrophy Campaign Fellow. FM is supported by the Great Ormond Street Children's Charity and the GOSH Biomedical Research Centre. This study was partly supported by the Muscular Dystrophy Campaign grant on CMD, the MRC Neuromuscular centre biobank and the Great Ormond Street Biomedical Research Centre. ES is a PhD student supported by the Medical Research Council (MRC), Great Ormond Street Children's Charity, and the Child Health Research Appeal Trust (CHRAT). KJC is a PhD student supported by the Wellcome Trust.

This work was supported in part by a Paul D. Wellstone Muscular Dystrophy Cooperative Research Center Grant (1U54NS053672, KPC, SAM, TW and FM). KPC is an Investigator of the Howard Hughes Medical Institute. CGB is supported by NINDS/NIH intramural funds. We are very grateful to Dr. A. Eddaoudi and his team for their help at the flow cytometry core facility at Great Ormond Street Hospital, to Dr. Mariacristina Scoto for assistance in gathering neuroimages and Dr. Anne Rutkowski and the support of Cure CMD for the Traveling Local Clinics.

This work was supported in part by a NWO Medium Investment Grant [40-00506-98-9001 to DJL] and by the Prinses Beatrix Fund for neuromuscular research [W.OR09-15 to DJL and HvB]. We are grateful to the Genomic Disorders Group, Radboud University Nijmegen Medical Centre, for performing exome sequencing for P5 and P6. Exome sequencing of P8 was supported by a grant from the National Human Genome Research Institute of the National Institutes of Health (NIH) (Medical Sequencing Program grant U54 HG003067, to the Broad Institute PI, Lander).

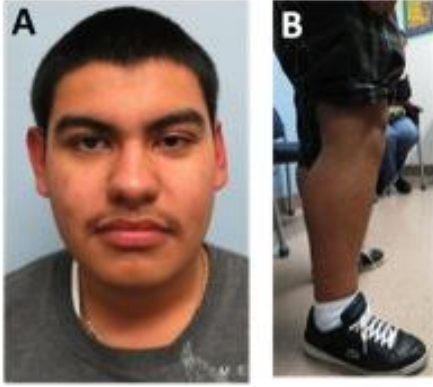

**Figure S1. Ophthalmologic and Muscle Findings in P3**

Asymmetric ptosis and strabismus (left-sided esotropia) (A) and pseudohypertrophy of the calf muscles (B) are seen in P3 at 16 years of age.

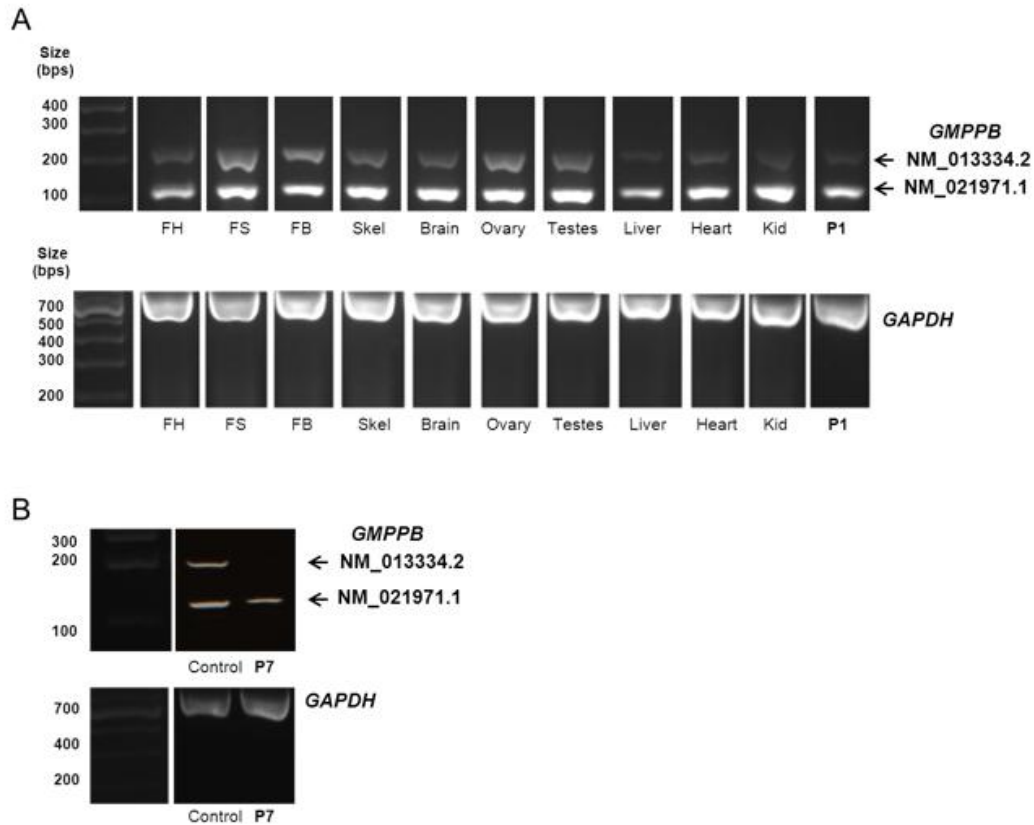

**Figure S2. RT-PCR Shows Widespread Expression of *GMPPB* in Human Tissues**

Human *GMPPB* is transcribed as two isoforms: NM\_021971.1 and NM\_013334.2. The coding DNA sequence of NM\_021971.1 is 1083 bp and 10 exons long. The coding DNA sequence of NM\_013334.2 is 1164 bp and 8 exons long. The first exon of NM-021971.1 encodes the 5'-UTR which is transcribed into mRNA. Exon 2-7 of NM-021971.1 and exons 1-7 of NM-013334.2 are identical. Exon 8 in NM-013334.2 contains the same sequence as exon 9 and exon 10 in NM-021971.1 but also contains an additional 81 bp. We amplified a 138 bp fragment of NM\_021971.1, which shows that this isoform is strongly expressed in all tissues tested. We amplified a 222 bp fragment of NM\_013334.2, which shows that it is only weakly expressed in the tested tissues. A 731 bp fragment of *GAPDH* indicates near-equivalent amounts of input cDNA. We also amplified fragments amplified from cDNA reverse transcribed from RNA extracted from P1, P7, and control fibroblasts using an RNeasy kit (Qiagen, Crawley, UK). FH = fetal heart; FS = fetal skeletal muscle; FB = fetal brain; skel = skeletal muscle; kid = kidney; P1 = cDNA from P1 fibroblasts. P7 = cDNA from P7 fibroblasts, Control = cDNA from healthy control fibroblasts.

(A) In a library of total RNA from adult and fetal tissues *GMPPB* isoform NM\_021971.1 is more highly expressed than *GMPPB* isoform NM\_013334.2. This is also the case for P1 fibroblast cDNA. This data also suggests that there is no developmental difference in the expression of the two isoforms.

(B) P7's expression of *GMPPB* isoform NM\_021971.1 cDNA is slightly reduced compared to the control cDNA and completely absent for expression of *GMPPB* isoform NM\_013334.2.

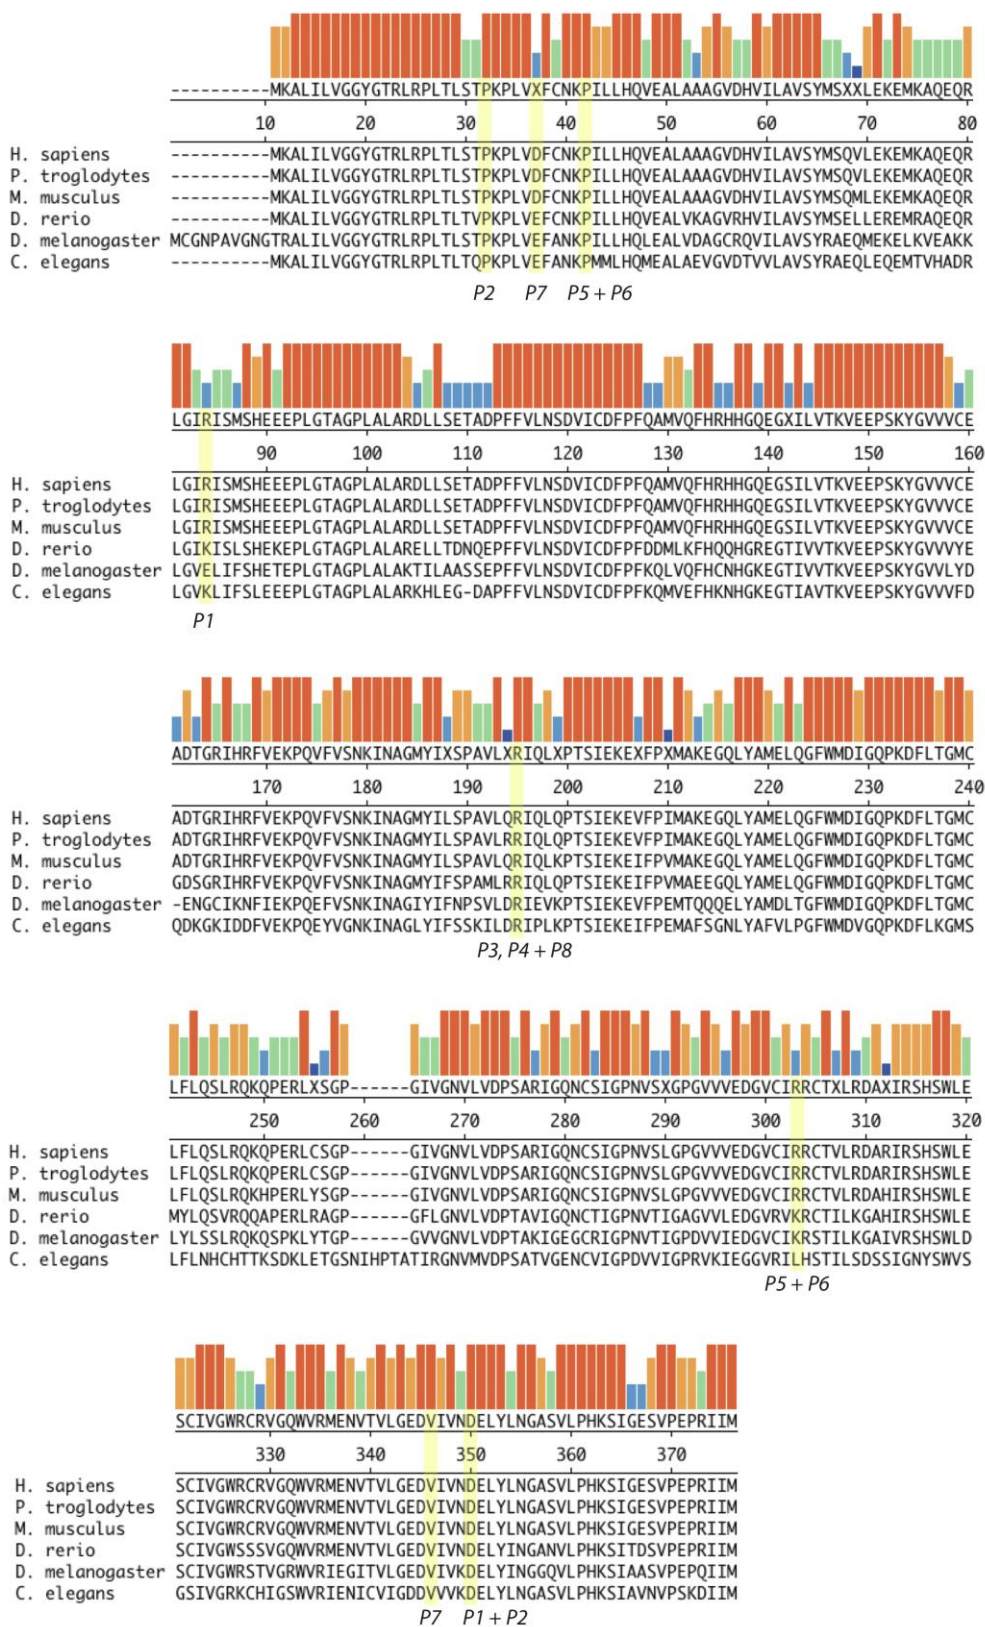

**Figure S3. Protein Alignment Showing Conservation of GMPPB**

Sequences are *Homo sapiens* (ENSP00000418565), *Pan troglodytes* (ENSPTRP00000025773), *Mus musculus* (ENSMUSP00000107914), *Danio rerio* (ENSDARP00000022618), *Drosophila melanogaster* (FBpp0078511), and *Caenorhabditis elegans* (C42C1.5). The height and colour of the bars indicates the degree of conservation of each amino acid residue, for example a red bar shows that a residue is conserved across all six species. The residues altered in our muscular dystrophy cases are highlighted in yellow.

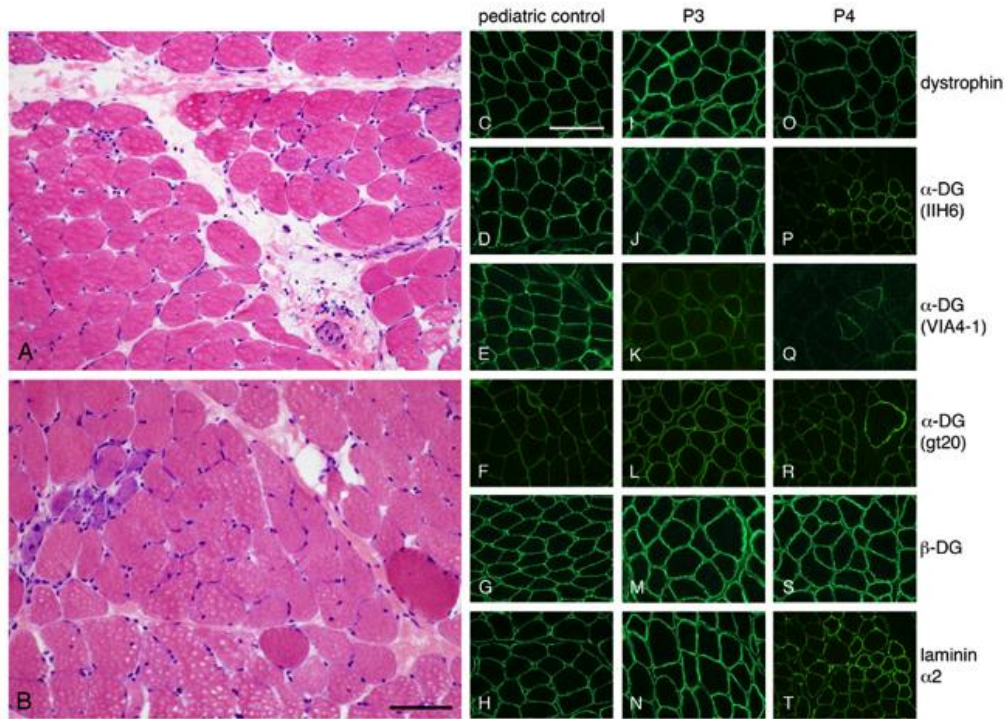

**Figure S4. Histopathology and Immunostaining for P3 and P4**

Mild to moderate dystrophic features were present (A = P3 and B = P4). Immunofluorescence abnormalities are shown in panels C-T. The size bars in panels B and C are 100  $\mu$ m.

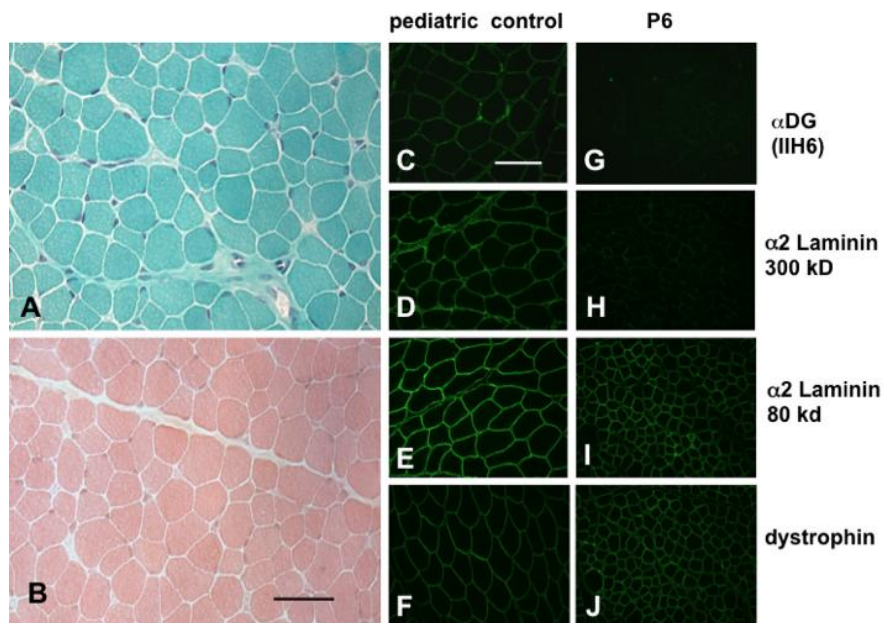

**Figure S5. Skeletal Muscle Biopsy of P6 Shows Hypoglycosylation of  $\alpha$ -DG**

The left rectus femoris was biopsied at age 3. There was moderate variation in fiber size, very few necrotic and regenerating fibers (not shown) and mild interstitial fibrosis (A-Gomori's trichrome stain; B-H&E stain). Immunofluorescence showed normal expression of dystrophin and laminin- $\alpha$ 2 (80 kD isoform), but strongly decreased staining with the glycoepitope-specific antibody IIH6 and for the laminin- $\alpha$ 2 300kD isoform. In panels A and B the bar corresponds to 10  $\mu$ m; in panels C-J the bar corresponds to 10  $\mu$ m.

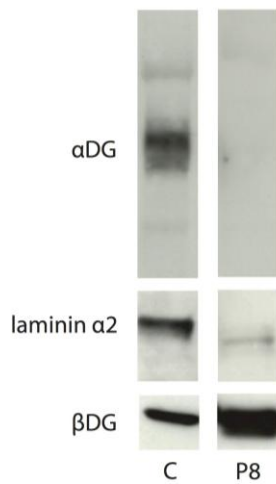

**Figure S6. Immunoblot Analysis of Skeletal Muscle Protein Lysates from P8**

The membrane was incubated with IIH6 and anti- $\beta$ -DG and anti-laminin- $\alpha$ 2 antibodies as previously described,<sup>1</sup> except that PVDF membranes were used along with Tris-Buffered Saline with Tween 20. P8 has a profound reduction in functional  $\alpha$ -DG glycosylation. The  $\beta$ -DG band for P8 appears as a possible doublet, as is also seen in P1 and P4.

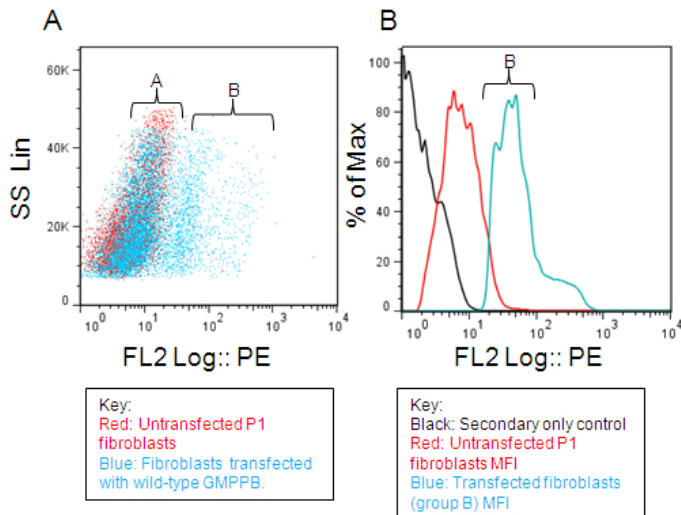

**Figure S7.  $\alpha$ -DG Glycosylation of P1 Fibroblasts Is Increased by Introduction of Wild-Type GMPPB**

We transfected affected subjects' fibroblasts with wildtype *GMPPB* using Gene Juice (Merck Millipore, Nottingham, UK) in serum free media. These cells were grown in DMEM (Gibco for Life Technologies, Paisley, UK) supplemented with 20% fetal bovine serum (FBS, PAA, UK) and plated on 60 mm plates so that they were 90% confluent on the day of transfection. Approximately 10,000 fibroblasts were analyzed per sample per experiment. 12-16 hours after transfection, we quantified  $\alpha$ -DG glycosylation of the cells by flow cytometry. P1 fibroblasts harbor the compound heterozygous *GMPPB* mutations c.1000G>A and c.220C>T. Transfection with the wildtype cDNA increased the amount of glycosylated  $\alpha$ -DG (assessed by flow cytometry and the IIH6 antibody). Approximately 10,000 fibroblasts were analyzed per sample per experiment. Untransfected P1 fibroblasts had a MFI of 24.7 while the transfected P1 fibroblasts had a MFI of 55.6 ( $p = 0.0015$ ). 23.5% of the transfected fibroblasts (bracketed population B) had an MFI of 76.2. Untransfected P1 fibroblasts were compared to P1 fibroblasts transfected with an empty vector and no significant change was observed in the MFI between the two populations (data not shown). SS Lin = side scatter linear scale.



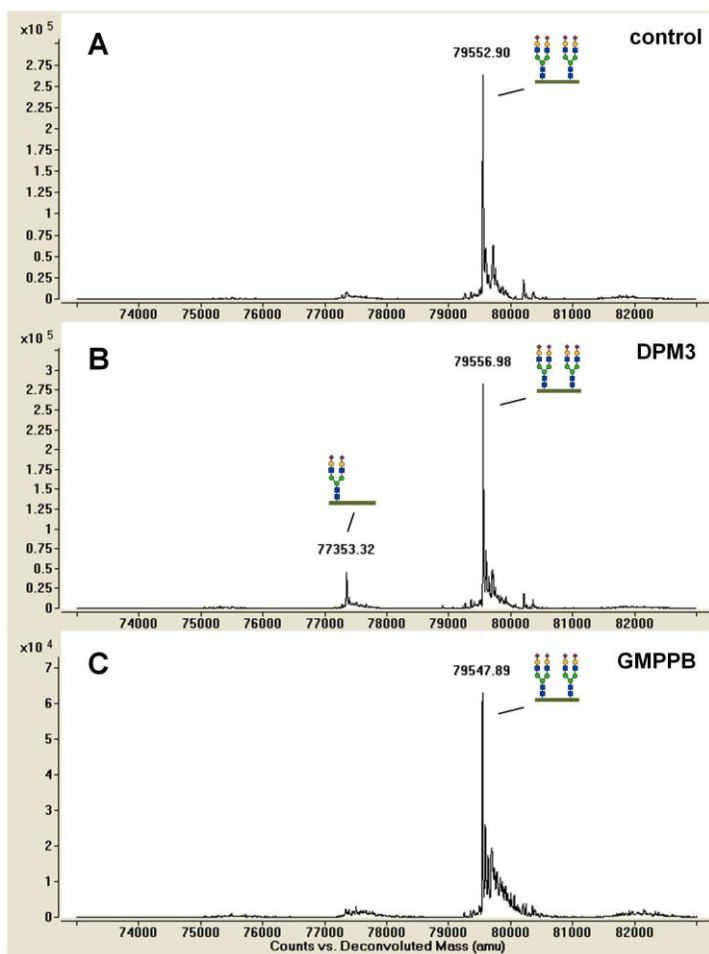

**Figure S8. High-Resolution Mass Spectrometry of Intact Transferrin Isolated from Serum for Analysis of N-glycosylation**

A 5  $\mu$ l serum sample was incubated with anti-transferrin beads as described.<sup>2</sup> The eluate was analyzed on a microfluidic 6540 LC-chip-QTOF instrument (Agilent Technologies) using a C8 protein chip. Data analysis was performed using Agilent Mass Hunter Qualitative Analysis Software B.04.00. The Agilent BioConfirm Software was used to deconvolute the charge distribution of raw data to reconstructed mass data.

(A) Serum transferrin of a control, showing transferrin with two complete N-glycans as the dominant peak.

(B) Serum transferrin of an individual with DPM3-CDG,<sup>3</sup> showing a partial loss of complete N-glycans (mass 77353), which is characteristic for CDG type I defects.

(C) Serum transferrin of GMPPB in P6 showing a normal N-glycosylation of transferrin, without signs of a loss of complete N-glycans.

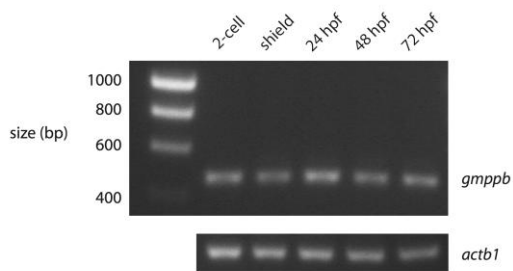

**Figure S9. RT-PCR Shows Expression of *gmppb* throughout Early Zebrafish Development**

We performed RT-PCR on RNA extracted from wildtype zebrafish embryos at the five developmental stages indicated. Expression of *gmppb* was detected at each stage, using PCR amplification of a 500 bp fragment of *gmppb* cDNA. An *actb1* fragment indicates near-equivalent amounts of input cDNA.

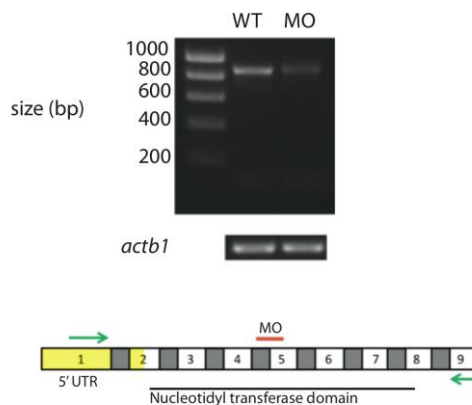

**Figure S10. The *gmppb* Splice Blocking Morpholino Disrupts RNA Splicing**

We extracted RNA from 48 hpf wildtype zebrafish embryos (WT) alongside embryos injected with the *gmppb* splice blocking morpholino (MO) (2.5 ng, 5 ng and 7.5 ng pooled). We performed RT-PCR and PCR amplified a ~900 bp fragment of *gmppb* cDNA using primers (indicated by green arrows on schematic diagram) that bind either side of the morpholino binding site (indicated by red line). A clear reduction in band intensity is seen in the MO embryos, indicating that the morpholino disrupts correct mRNA splicing. An *actb1* fragment indicates near-equivalent amounts of input cDNA.

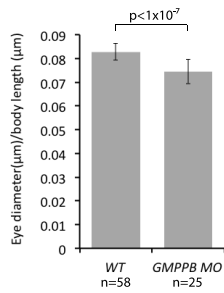

**Figure S11. *gmppb* MO Embryos Have Significantly Smaller Eyes than Wild-Type**

We measured the eye diameter of *gmppb* morphants and wildtype embryos and normalized each eye diameter measurement with the embryo's body length. Statistical significance was assessed using an unpaired two-tailed t-test.

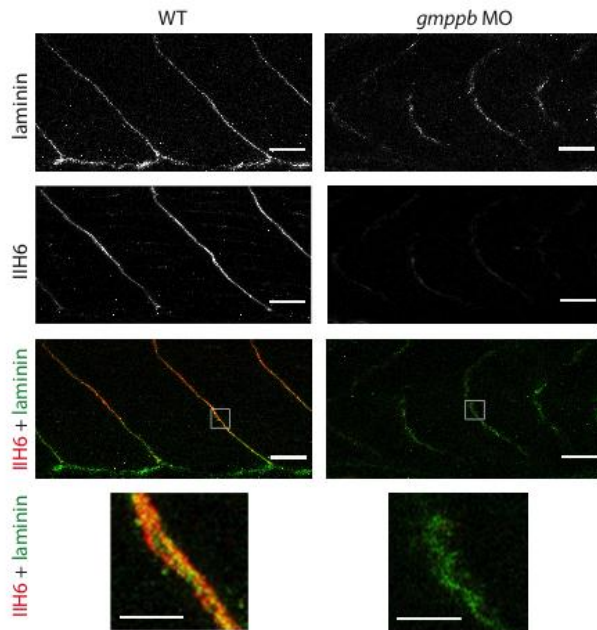

**Figure S12. Staining Using IIH6 and Anti-laminins Antibodies Shows that  $\alpha$ -DG of *gmppb* Morphants Is Hypoglycosylated Relative to Wild-Type**

Antibodies used are against laminins, (polyclonal antibody L9393, Sigma-Aldrich, Dorset, UK), and glycosylated  $\alpha$ -DG (monoclonal antibody IIH6, from Professor Kevin Campbell). Staining of laminins revealed abnormal myosepta structure, while the fluorescent intensity of IIH6 epitope was significantly reduced in *gmppb* morphants. White square indicates magnified area. Scale bar = 25  $\mu$ m except for magnified area where scale bar = 6  $\mu$ m.

**Table S1. Primers Used to Analyze *GMPPB* Expression in Human Tissues**

| Gene         | Fragment size (bp)                        | Direction | Primer Sequence (5'–3') |
|--------------|-------------------------------------------|-----------|-------------------------|
| <i>GMPPB</i> | 138 (NM_021971.1) or<br>222 (NM_013334.2) | Forward   | gtggcgaagatgggtgtg      |
|              |                                           | Reverse   | cactgtcacgttctccatgc    |
| <i>GAPDH</i> | 731                                       | Forward   | cccatcaccatctccagga     |
|              |                                           | Reverse   | ttgtcaccaggaatgagc      |

**Table S2. Primers Used in *GMPPB* pcDNA 3.1/V5-HIS TOPO Construction and Mutagenesis**

| Function                                     | Direction | Primer Sequence (5'–3')                   |
|----------------------------------------------|-----------|-------------------------------------------|
| Amplify <i>GMPPB</i> CDS<br>from IMAGE clone | Forward   | atgaaggcactgatcttagtg                     |
|                                              | Reverse   | catgatgatacaggctctggc                     |
| Introduce p.Asp334Asn<br>(P1 and P2)         | Forward   | gggtgaggacgtcatagttaataatgagctctacctc     |
|                                              | Reverse   | gaggtagagctcattattaactatgacgtcctcacc<br>c |
| Introduce p.Pro22Ser<br>(P2)                 | Forward   | gacgctgagcacctcgaagccactggt               |
|                                              | Reverse   | accagtggctcagagtgctcagcgtc                |
| Introduce p.Arg185Cys<br>(P3, P4 and P8)     | Forward   | gcagtgctgcggtgcatccagctgc                 |
|                                              | Reverse   | gcagctggatgcaccgagcactgc                  |
| Introduce p.Pro32Leu<br>(P5 and P6)          | Forward   | ggacttctgcaataagctcatcttctgctcaccaag      |
|                                              | Reverse   | cttggtgcagcaagatgagcttattgcagaagtcc       |
| Introduce p.Arg287Gln<br>(P5 and P6)         | Forward   | ggtgtgttatccagcgggtgcacgggtg              |
|                                              | Reverse   | caccgtgcaccgctggatacacacacc               |
| Introduce p.Asp27His<br>(P7)                 | Forward   | ccgaagccactggtgcacttctgcaataagc           |
|                                              | Reverse   | gcttattgcagaagtgcaccagtggtctcg            |
| Introduce p.Val330Ile<br>(P7)                | Forward   | cagtgtgggtgaggacatcatagttaatgatgag        |
|                                              | Reverse   | ctcatcattaactatgatgtcctcaccagcactg        |

The bold nucleotide indicates the mutation.

**Table S3. Primers Used to Analyze *gmppb* Expression in Early Zebrafish Development, and Splicing Disruption in *gmppb* Knockdowns**

| Function                            | Direction | Primer Sequence (5'–3') |
|-------------------------------------|-----------|-------------------------|
| Expression analysis and MO-flanking | Forward   | tacagcagcagggtcaatcgt   |
| Expression analysis                 | Reverse   | acaacaatggtgcctctct     |
| MO-flanking                         | Reverse   | gttctgccaatcactgctg     |

The sequences of the *actb1* primers have been previously described.<sup>4</sup>

**Table S4. Variant Filtering of Exome Data for P1**

| Filter                                                            | Number of Variants                   |
|-------------------------------------------------------------------|--------------------------------------|
| Total number of high quality PASS variants                        | 47146                                |
| Removed variants in dbSNP132, 1000G, UK10K, controls              | 1991                                 |
| Functional variants                                               | 482                                  |
| Loss-of-function variants (heterozygous)                          | 22                                   |
| Genes with 2 functional variants (possible compound heterozygous) | 2 ( <i>MAN1B1</i> and <i>GMPPB</i> ) |

**Table S5. Population Frequency of *GMPPB* Mutations Identified in Affected Individuals**

| Case | Genomic Position (Build 37) | Mutation (cDNA Change) | Amino Acid Residue Change (Protein) | Sequencing Method | rsID        | MAF (Source)         |
|------|-----------------------------|------------------------|-------------------------------------|-------------------|-------------|----------------------|
| P1   | 3:49760726                  | c.220C>T               | p.Arg74*                            | Exome             | None        | None                 |
|      | 3:49759268                  | c.1000G>A              | p.Asp334Asn                         |                   | None        | None                 |
| P2   | 3:49761096                  | c.64C>T                | p.Pro22Ser                          | Sanger            | None        | None                 |
|      | 3:49759268                  | c.1000G>A              | p.Asp334Asn                         |                   | None        | None                 |
| P3   | 3:49759946                  | Hom<br>c.553C>T        | p.Arg185Cys                         | Exome             | None        | None                 |
| P4   | 3:49759946                  | Hom<br>c.553C>T        | p.Arg185Cys                         | Sanger            | None        | None                 |
| P5   | 3:49760905                  | c.95C>T                | p.Pro32Leu                          | Exome             | None        | None <sup>b</sup>    |
|      | 3:49759490                  | c.860G>A               | p.Arg287Gln                         |                   | rs142908436 | 0.00041 <sup>a</sup> |
| P6   | 3:49760905                  | c.95C>T                | p.Pro32Leu                          | Exome             | None        | None <sup>b</sup>    |
|      | 3:49759490                  | c.860G>A               | p.Arg287Gln                         |                   | rs142908436 | 0.00041 <sup>a</sup> |
| P7   | 3:49761081                  | c.79G>C                | p.Asp27His                          | Sanger            | rs142336618 | 0.001 <sup>a</sup>   |
|      | 3:49759280                  | c.988G>A               | p.Val330Ile                         |                   | rs199922550 | 0.001 <sup>c</sup>   |
| P8   | 3:49759946                  | Hom<br>c.553C>T        | p.Arg185Cys                         | Exome             | None        | None                 |

MAF = minor allele frequency (out of 1). <sup>a</sup>MAF data from UK10K twins cohort. <sup>b</sup> Although this change has not been reported, another variant involving this nucleotide has (3:49760905C>A; MAF = 0.000077). <sup>c</sup>MAF data from ClinSeq study.<sup>6</sup>

**Table S6. Percentage Identity of *GMPPB* Ortholog of Five Diverse Eukaryotic Species with Human *GMPPB***

| Species                        | <i>GMPPB</i> Ortholog Name | Ensembl Identifier | % ID of <i>GMPPB</i> Ortholog with Human <i>GMPPB</i> |
|--------------------------------|----------------------------|--------------------|-------------------------------------------------------|
| <i>Pan troglodytes</i>         | <i>GMPPB</i>               | ENSPTRP00000025773 | 99.7                                                  |
| <i>Mus musculus</i>            | <i>GMPPB</i>               | ENSMUSP00000107914 | 98.1                                                  |
| <i>Danio rerio</i>             | <i>GMPPB</i>               | ENSDARP00000022618 | 81.4                                                  |
| <i>Drosophila melanogaster</i> | CG1129                     | FBpp0078511        | 70.2                                                  |
| <i>Caenorhabditis elegans</i>  | TAG-335                    | C42C1.5            | 63.8                                                  |

Orthologs identified by BLAST alignment of the *H. sapiens* *GMPPB* sequence (ENSP00000418565) against the genomes of the species shown.

**Table S7. Transfection with Wild-Type *GMPPB* Increases  $\alpha$ -DG Glycosylation for P1 Fibroblasts**

|                                                                                | <b>P1</b> | <b>Control</b> |
|--------------------------------------------------------------------------------|-----------|----------------|
| <b>Untransfected cell MFI</b>                                                  | 24.7      | 82             |
| <b>Transfected cell MFI (all cells)</b>                                        | 55.60     | 80.9           |
| <b>Transfected cell w/ higher MFI than untransfected cells (subpopulation)</b> | 76.2      | n/a            |
| <b>n</b>                                                                       | 3         | 3              |
| <b>p</b>                                                                       | 0.0015    | NS             |

MFI= mean fluorescence intensity of I1H6 positive cells. N= number of repeat experiments. P values are for a paired two-tailed *t*-test comparing untransfected cell MFI to transfected cell MFI (total). P<0.05=significant. NS= not significant.

## References

1. Stevens, E., Carss, K.J., Cirak, S., Foley, A.R., Torelli, S., Willer, T., Tambunan, D.E., Yau, S., Brodd, L., Sewry, C.A., et al. (2013). Mutations in B3GALNT2 Cause Congenital Muscular Dystrophy and Hypoglycosylation of alpha-Dystroglycan. *American journal of human genetics* 92, 354-365.
2. Babovic-Vuksanovic, D., and O'Brien, J.F. (2007). Laboratory diagnosis of congenital disorders of glycosylation type I by analysis of transferrin glycoforms. *Molecular diagnosis & therapy* 11, 303-311.
3. Lefeber, D.J., Schonberger, J., Morava, E., Guillard, M., Huyben, K.M., Verrijp, K., Grafakou, O., Evangelidou, A., Preijers, F.W., Manta, P., et al. (2009). Deficiency of Dol-P-Man synthase subunit DPM3 bridges the congenital disorders of glycosylation with the dystroglycanopathies. *American journal of human genetics* 85, 76-86.
4. Roscioli, T., Kamsteeg, E.J., Buysse, K., Maystadt, I., van Reeuwijk, J., van den Elzen, C., van Beusekom, E., Riemersma, M., Pfundt, R., Vissers, L.E., et al. (2012). Mutations in ISPD cause Walker-Warburg syndrome and defective glycosylation of alpha-dystroglycan. *Nature genetics* 44, 581-585.
5. Exome Variant Server, NHLBI GO Exome Sequencing Project (ESP). In. (Seattle, WA).
6. Biesecker, L.G., Mullikin, J.C., Facio, F.M., Turner, C., Cherukuri, P.F., Blakesley, R.W., Bouffard, G.G., Chines, P.S., Cruz, P., Hansen, N.F., et al. (2009). The ClinSeq Project: piloting large-scale genome sequencing for research in genomic medicine. *Genome research* 19, 1665-1674.
